# Supplementary material for: Genetics of self-incompatibility in perennial ryegrass (Lolium perenne L.)
Source: Royal Society of Chemistry journal article supplement (doi:10.1039/c3dt52269e), 2013-07-01
Supplement: c3dt52269e.pdf [file c3dt52269e.pdf]

## Electronic Supplementary Information

### *Synthesis of Li/OR phosphinidenoid complexes – on the evidence for intramolecular O-Li donation and the effect of cation encapsulation*

Rainer Streubel,\* Andreas Wolfgang Kyri, and Gregor Schnakenburg

Content:

|           |                                                                          |           |                |            |
|-----------|--------------------------------------------------------------------------|-----------|----------------|------------|
| <b>1.</b> | <b>Crystal structure data</b>                                            | <b>of</b> | <b>complex</b> | <b>12a</b> |
|           | <b>(C<sub>27</sub>H<sub>21</sub>O<sub>6</sub>PW).....</b>                |           |                | <b>2</b>   |
| <b>2.</b> | <b>Crystal structure data</b>                                            | <b>of</b> | <b>complex</b> | <b>14c</b> |
|           | <b>(C<sub>15</sub>H<sub>27</sub>O<sub>6</sub>PSi<sub>2</sub>W).....</b>  |           |                | <b>2</b>   |
| <b>3.</b> | <b>Crystal structure data</b>                                            | <b>of</b> | <b>complex</b> | <b>15a</b> |
|           | <b>(C<sub>15</sub>H<sub>25</sub>O<sub>6</sub>PSi<sub>2</sub>Mo).....</b> |           |                | <b>3</b>   |
| <b>4.</b> | <b>Crystal structure data</b>                                            | <b>of</b> | <b>complex</b> | <b>16a</b> |
|           | <b>(C<sub>15</sub>H<sub>25</sub>O<sub>6</sub>PSi<sub>2</sub>Cr).....</b> |           |                | <b>3</b>   |

**Crystal structure data of complex 12a (C<sub>27</sub>H<sub>21</sub>O<sub>6</sub>PW):** crystal size 0.15 x 0.13 x 0.07 mm, monoclinic, P 2<sub>1</sub>/c, a = 12.1595(2), b = 10.5241(3), c = 19.7949(5) Å, α = 90, β = 97.6003(14), γ = 90°, V = 2510.86(10) Å<sup>3</sup>, Z = 4, ρ<sub>calc</sub> = 1.736 Mg m<sup>-3</sup>, 2θ<sub>max</sub> = 56°, collected (independent) reflections = 42848 (6035), R<sub>int</sub> = 0.1325, μ = 4.704 mm<sup>-1</sup>, 319 refined parameters, 1 restraints, R<sub>1</sub> (for I > 2σ(I)) = 0.0398, wR<sub>2</sub> (for all data) = 0.0841, max./min. residual electron density = 2.728/-2.054 e · Å<sup>-3</sup>.

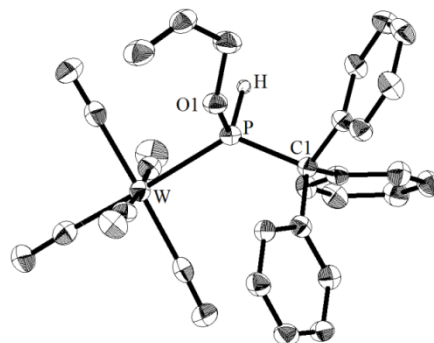

Molecular structure of complex **12a** in the crystal (50% probability level, hydrogen atoms except on P are omitted for clarity). Selected bond lengths [Å] and angles [°]: W–P 2.4993(13), P–C(1) 1.915(4), P–O(1) 1.622(3), P–H 1.38(4), W–P–H 115.2(18), W–P–C(1) 126.3(15), W–P–O(1) 106.66(13), H–P–O(1) 101.2(17), C(1)–P–O(1) 104.83(18), C(1)–P–H 99.6(17).

**Crystal structure data of complex 14c (C<sub>15</sub>H<sub>27</sub>O<sub>6</sub>PSi<sub>2</sub>W):** crystal size 0.12 x 0.04 x 0.04 mm, triclinic, P -1, a = 9.3698(2), b = 10.3785(2), c = 12.2990(2) Å, α = 76.1508(14), β = 85.9396(14), γ = 88.6518(12)°, V = 1158.30(4) Å<sup>3</sup>, Z = 2, ρ<sub>calc</sub> = 1.647 Mg m<sup>-3</sup>, 2θ<sub>max</sub> = 56°, collected (independent) reflections = 29506 (5556), R<sub>int</sub> = 0.0724, μ = 5.182 mm<sup>-1</sup>, 237 refined parameters, 3 restraints, R<sub>1</sub> (for I > 2σ(I)) = 0.0310, wR<sub>2</sub> (for all data) = 0.0598, max./min. residual electron density = 1.567/-1.779 e · Å<sup>-3</sup>.

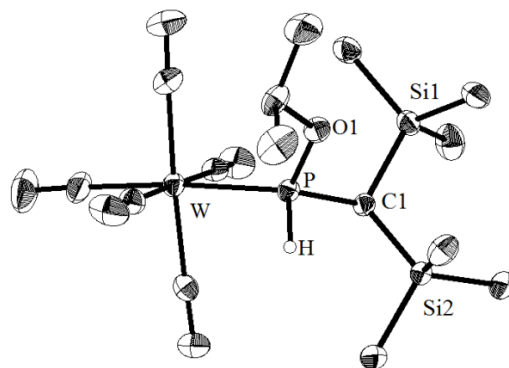

Molecular structure of complex **14c** in the crystal (50% probability level, hydrogen atoms except on P are omitted for clarity). Selected bond lengths [Å] and angles [°]: W–P 2.4816(8), P–C(1) 1.810(3), P–O(1) 1.626(2), P–H 1.43(2), W–P–H 109.1(12), W–P–C(1) 120.11(11), W–P–O(1) 121.33(9), H–P–O(1) 100.7(13), C(1)–P–O(1) 99.70(13), C(1)–P–H 102.9(13).

**Crystal structure data of complex 15a (C<sub>15</sub>H<sub>25</sub>O<sub>6</sub>PSi<sub>2</sub>Mo):** crystal size 0.27 x 0.10 x 0.05 mm, monoclinic, P 2<sub>1</sub>/c, a = 16.6435(7), b = 9.4805(4), c = 14.8822(7) Å, α = 90, β = 106.9120(10), γ = 90°, V = 2246.69(17) Å<sup>3</sup>, Z = 4, ρ<sub>calc</sub> = 1.432 Mg m<sup>-3</sup>, 2θ<sub>max</sub> = 56°, collected (independent) reflections = 13098 (5414), R<sub>int</sub> = 0.0320, μ = 0.786 mm<sup>-1</sup>, 235 refined parameters, 5 restraints, R<sub>1</sub> (for I > 2σ(I)) = 0.0318, wR<sub>2</sub> (for all data) = 0.0880, max./min. residual electron density = 0.812/−0.958 e · Å<sup>-3</sup>.

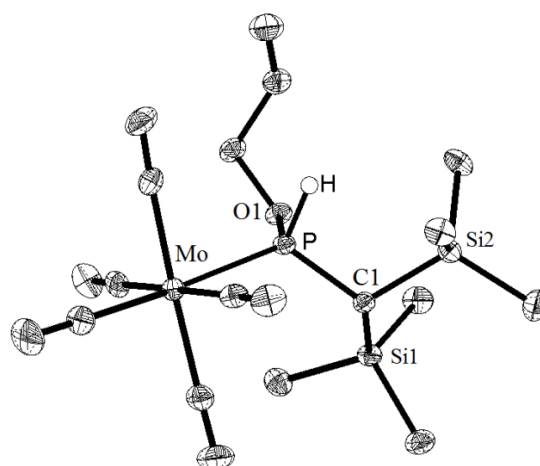

Molecular structure of complex **15a** in the crystal (50% probability level, hydrogen atoms except on P are omitted for clarity). Selected bond lengths [Å] and angles [°]: Mo–P 2.4788(6), P–C(1) 1.812(2), P–O(1) 1.6264(15), P–H 1.30(2), Mo–P–H 111.0(10), Mo–P–C(1) 120.43(7), Mo–P–O(1) 119.70(6), H–P–O(1) 99.0(10), C(1)–P–O(1) 99.71(8), C(1)–P–H 103.9(9).

**Crystal structure data of complex 16a (C<sub>15</sub>H<sub>25</sub>O<sub>6</sub>PSi<sub>2</sub>Cr):** crystal size 0.20 x 0.10 x 0.02 mm, monoclinic, P 2<sub>1</sub>/c, a = 16.500(2), b = 9.2871(12), c = 14.7982(16) Å, α = 90, β = 107.024(3), γ = 90°, V = 2168.3(5) Å<sup>3</sup>, Z = 4, ρ<sub>calc</sub> = 1.349 Mg m<sup>-3</sup>, 2θ<sub>max</sub> = 56°, collected (independent) reflections = 23154 (5218), R<sub>int</sub> = 0.0489, μ = 0.737 mm<sup>-1</sup>, 235 refined parameters, 10 restraints, R<sub>1</sub> (for I > 2σ(I)) = 0.0358, wR<sub>2</sub> (for all data) = 0.0834, max./min. residual electron density = 0.403/−0.349 e · Å<sup>-3</sup>.

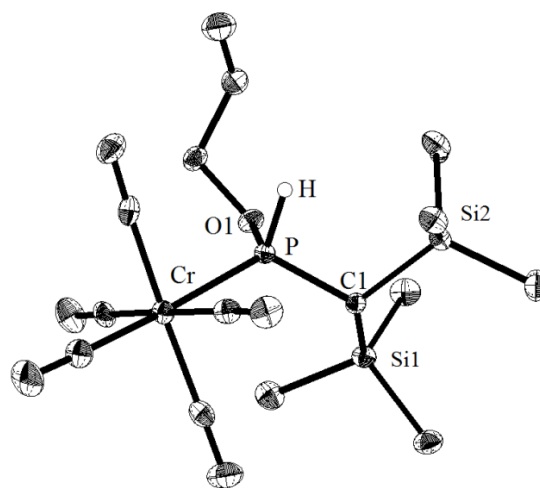

Molecular structure of complex **16a** in the crystal (50% probability level, hydrogen atoms except on P are omitted for clarity). Selected bond lengths [Å] and angles [°]: Cr–P 2.3281(6),

P-C(1) 1.8084(19), P-O(1) 1.6234(14), P-H 1.308(19), Cr-P-H 109.4(9), Cr-P-C(1)  
120.47(7), Cr-P-O(1) 119.48(5), H-P-O(1) 101.8(9), C(1)-P-O(1) 99.80(8), C(1)-P-H  
103.3(9).
